# Supplementary material for: A thermoresponsive microfluidic system integrating a shape memory polymer-modified textile and a paper-based colorimetric sensor for the detection of glucose in human sweat
Source: PubMed Central journal article supplement — RSC Adv. 2019 Aug 2;9(41):23957–63. doi: 10.1039/c9ra02831e (PMC9069540; doi:10.1039/c9ra02831e), 2019-08-02
Supplement: RA-009-C9RA02831E-s001.pdf [file RA-009-C9RA02831E-s001.pdf]

## *Supplementary Information*

---

### **A thermal-responsive microfluidic system integrated by shape memory polymer-modified textile and paper-based colorimetric sensor for human sweat glucose detection**

Jing He<sup>a,b</sup>, Gang Xiao<sup>a,b</sup>, Xiaodie Chen<sup>a,b</sup>, Yan Qiao<sup>a,b</sup>, Dan Xu<sup>c</sup> and Zhisong Lu<sup>\*a,b</sup>

---

<sup>a</sup> *Key Laboratory of Luminescent and Real-Time Analytical Chemistry (Southwest University), Ministry of Education, School of Materials & Energy, Southwest University, 1 Tiansheng Road, Chongqing 400715, P. R. China.*

<sup>b</sup> *Institute for Clean Energy & Advanced Materials, School of Materials & Energy, Southwest University, 1 Tiansheng Road, Chongqing 400715, P. R. China.*

<sup>c</sup> *Department of Gastroenterology, the Central Hospital of Wuhan, Tongji Medical College, Huazhong University of Science and Technology, Shengli Street Jiang'an District No. 26, Wuhan 430014, P. R. China.*

*\*: Authors to whom correspondence should be addressed. Tel.: +86-23-68254732; Fax: +86-23-68254969. E-mail: zslu@swu.edu.cn (Z. S. Lu) or drxu0624@gmail.com (D. Xu).*

## Supplementary Information

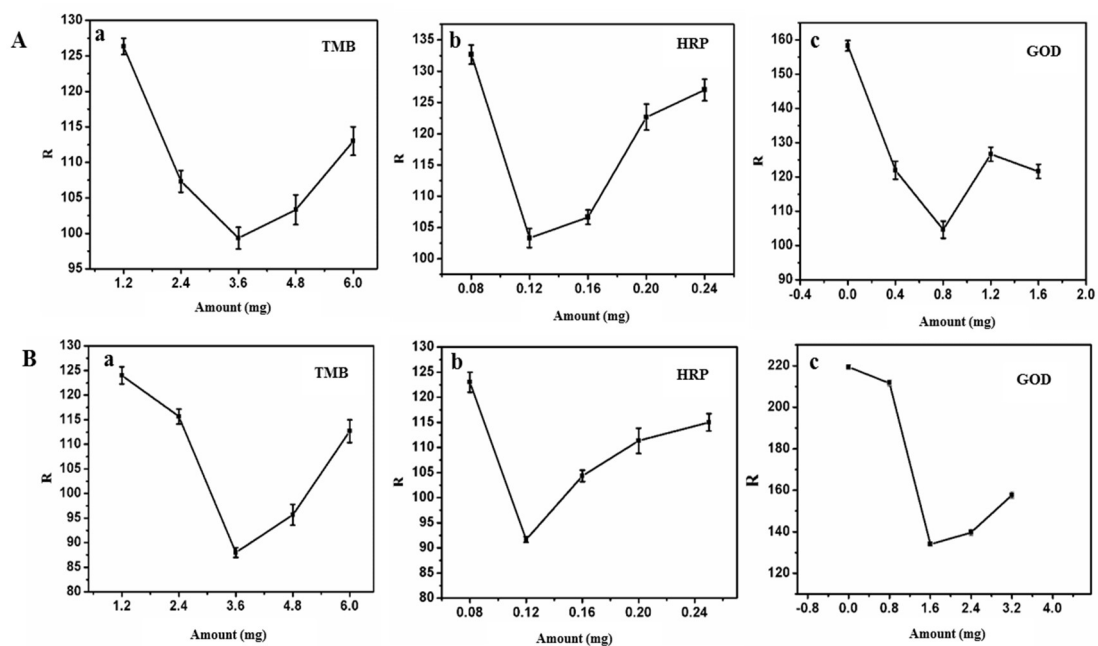

**Figure S1.** Optimization of the amount of TMB (a), HRP (b) and GOD (c) at room temperature (A) and 60 °C (B), respectively.

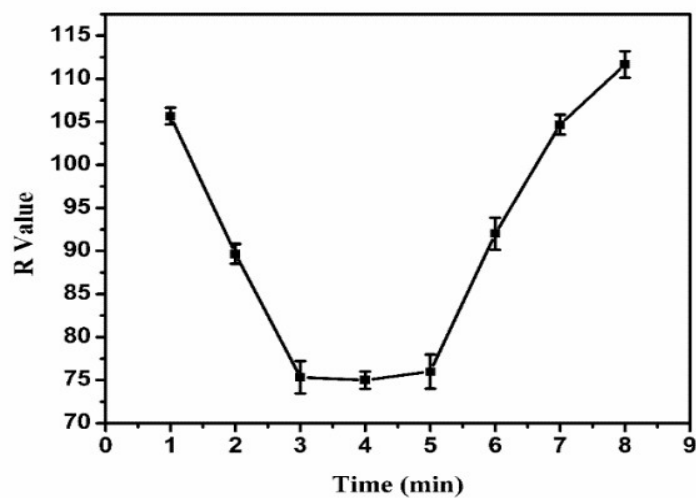

**Figure S2.** Optimization of reaction time in the sensing unit.

## Supplementary Information

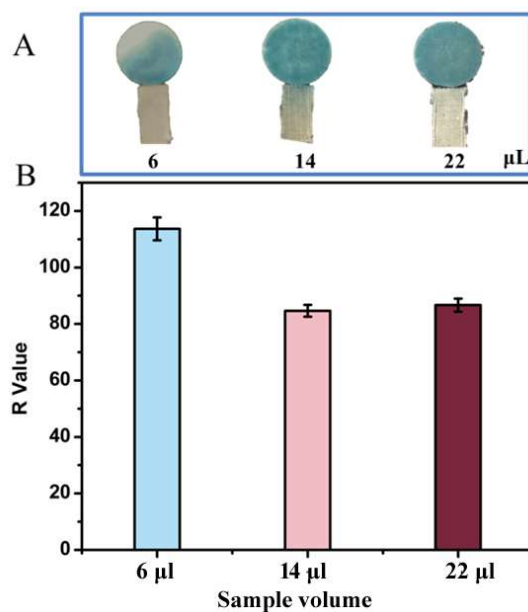

**Figure S3.** Effect of sample volume on paper-based glucose detection.

Table S1. Comparison of the sensing performance

| Ref.      | Analytical technique | Materials and platform          | Recognition element | dynamic range        | LOD                 |
|-----------|----------------------|---------------------------------|---------------------|----------------------|---------------------|
| [1]       | Electrochemical      | PET wristband/handband          | GOD                 | 0-300 $\mu\text{M}$  | -                   |
| [2]       | Electrochemical      | Metal and Metal/Oxide thin film | Gold/Zinc Oxide     | 0.01-200mg/dl        | 0.1 mg/dl           |
| [3]       | Piezoelectrical      | Tatto-Based and Nanoarrays      | GOD                 | 0-200 $\mu\text{M}$  | 0.01 mM             |
| [4]       | Colormetric          | PDMS and Paper                  | GOD                 | 0.5-15mM             | 200 $\mu\text{M}$   |
| [5]       | Colormetric          | Cotton thread and paper         | GOD                 | 35-250 $\mu\text{M}$ | 35 $\mu\text{M}$    |
| This work | Colormetric          | Cotton and paper                | GOD                 | 0-600 $\mu\text{M}$  | 13.49 $\mu\text{M}$ |

### References:

- [1] Gao W, Emaminejad S, Nyein H Y Y, et al. Fully integrated wearable sensor arrays for multiplexed in situ perspiration analysis [J]. Nature, 2016, 529(7587): 509-514.

## *Supplementary Information*

---

[2] Munje R D, Muthukumar S, Prasad S. Lancet-free and label-free diagnostics of glucose in sweat using Zinc Oxide based flexible bioelectronics[J]. *Sensors and Actuators B: Chemical*, 2017, 238: 482-490.

[3] Han W, He H, Zhang L, et al. A self-powered wearable noninvasive electronic-skin for perspiration analysis based on piezo-biosensing unit matrix of enzyme/ZnO nanoarrays [J]. *ACS Applied Materials & Interfaces*, 2017, 9(35):29526-29537.

[4] Koh A, Kang D, Xue Y, et al. A soft, wearable microfluidic device for the capture, storage, and colorimetric sensing of sweat [J]. *Science Translational Medicine*, 2016, 8(366):366ra165.

[5] Xiao G, He J, Chen X, et al. A wearable, cotton thread/paper-based microfluidic device coupled with smartphone for sweat glucose sensing[J]. *Cellulose*, 2019, 26(7): 4553-4562.
